# Supplementary material for: Spectroscopic Insights of an Emissive Complex between 4′-N,N-Diethylaminoflavonol in Octa-Acid Deep-Cavity Cavitand and Rhodamine 6G
Source: MDPI journal article supplement (doi:10.3390/molecules28114260), 2023-05-23
Supplement: s1 [file s1]

# Supplementary Material

## Spectroscopic Insights of an Emissive Complex between 4'-*N,N*-Diethylaminoflavonol in Octa-Acid Deep-Cavity Cavitand and Rhodamine 6G

Fabiano da Silveira Santos <sup>1</sup>, Elamparuthi Ramasamy <sup>2</sup>, Lilian Camargo da Luz <sup>1</sup>, Vaidhyanathan Ramamurthy <sup>3,\*</sup> and Fabiano Severo Rodembusch <sup>1,\*</sup>

<sup>1</sup> Grupo de Pesquisa em Fotoquímica Orgânica Aplicada, Instituto de Química, Universidade Federal do Rio Grande do Sul, Av. Bento Gonçalves 9500, Bairro Agronomia, Porto Alegre CEP 91501-970, Brazil; fabiano@ufrgs.br (F.d.S.S)

<sup>2</sup> Department of Chemistry and Biochemistry, The University of Texas at Arlington, Arlington, TX 76019, USA

<sup>3</sup> Department of Chemistry, University of Miami, 1301 Memorial Drive, Miami, FL 33124, USA

\* Correspondence: murthy1@miami.edu (V.R.); Correspondence: rodembusch@iq.ufrgs.br (F.S.R.); Tel.: +1-305-284-1534 (V.R.); +55-51-3308-9639 (F.S.R.); Fax: +1-305-284-4571 (V.R.); +55-51-3308-7304 (F.S.R.)

### Summary

|                                     |   |
|-------------------------------------|---|
| Additional photophysical data ..... | 2 |
|-------------------------------------|---|

### Additional photophysical data

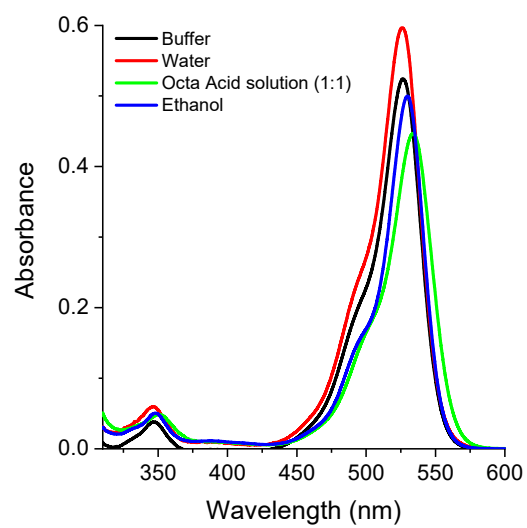

**Figure S1.** UV-Vis absorption spectra of R6G in different media.

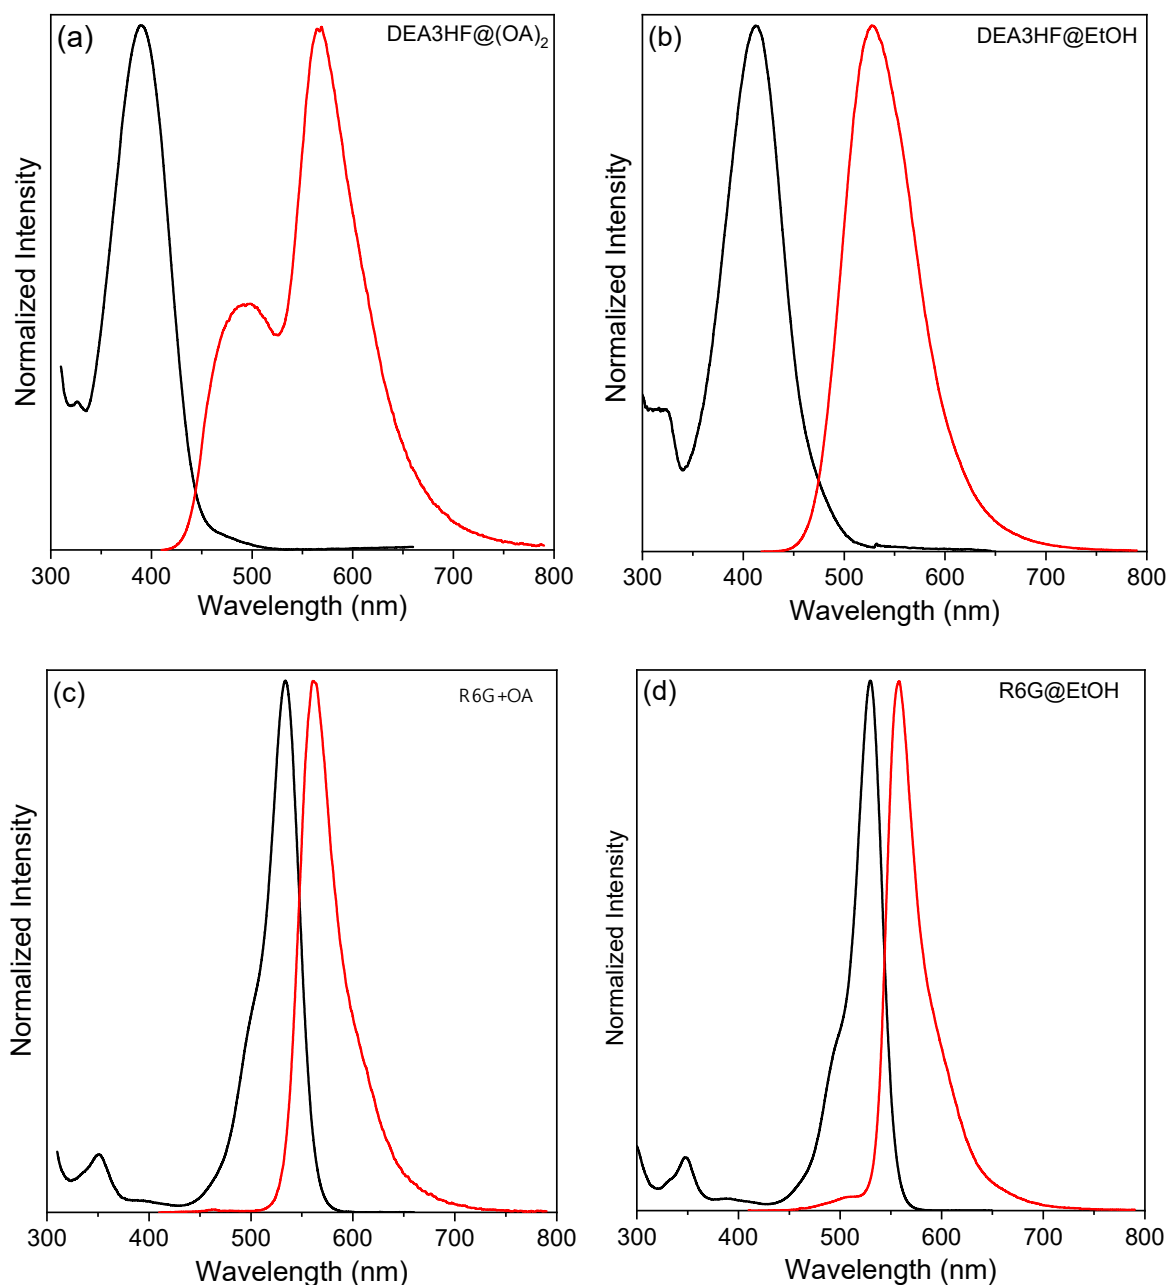

**Figure S2.** Normalized UV-Vis absorption (black line) and steady-state fluorescence emission (red line) spectra of (a) DEA3HF@ $(\text{OA})_2$  in sodium borate buffer, (b) DEA3HF in ethanol, (c) R6G in presence of OA in sodium tetraborate buffer, and (d) R6G in ethanol. The respective emission spectra were acquired using the absorption maxima as excitation wavelength.

**Table S1.** Relevant data from the time-resolved fluorescence spectroscopy from R6G in different media, where  $\lambda_{em}$  (nm) is the analyzed emission wavelength, B is the pre-exponential factor,  $\tau$  (ns) is the fluorescence lifetime, Rel. (%) is relative contribution and  $\chi^2$  is the chi-square of the fit.

| System                | Molar Ratio | $\lambda_{em}$ | B      | $\tau$ | Rel. | $\chi^2$ |
|-----------------------|-------------|----------------|--------|--------|------|----------|
| R6G in presence of OA | 1.0         | 564            | 2136.7 | 4.735  | 100  | 1.087    |
| R6G@EtOH              | -           | 557            | 5998.3 | 4.387  | 100  | 1.075    |
| R6G@Water Buffer      | -           | 556            | 3563.1 | 4.256  | 100  | 1.104    |

Excitation Source: EPL405

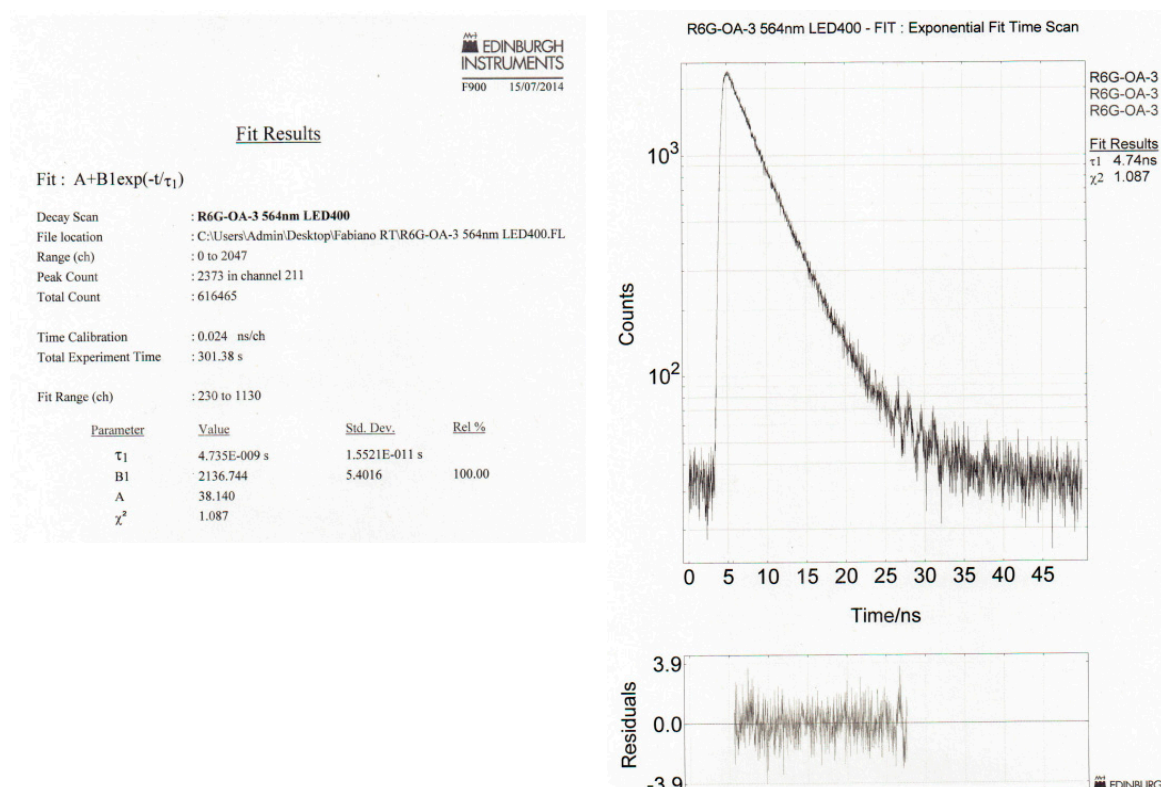

**Figure S3.** Relevant data from time-resolved fluorescence spectroscopy (left) and time decay curve and respective residuals from [R6G]:[OA]=1.0 (molar ratio). (Excitation wavelength: 405 nm; monitored emission wavelength: 564 nm).

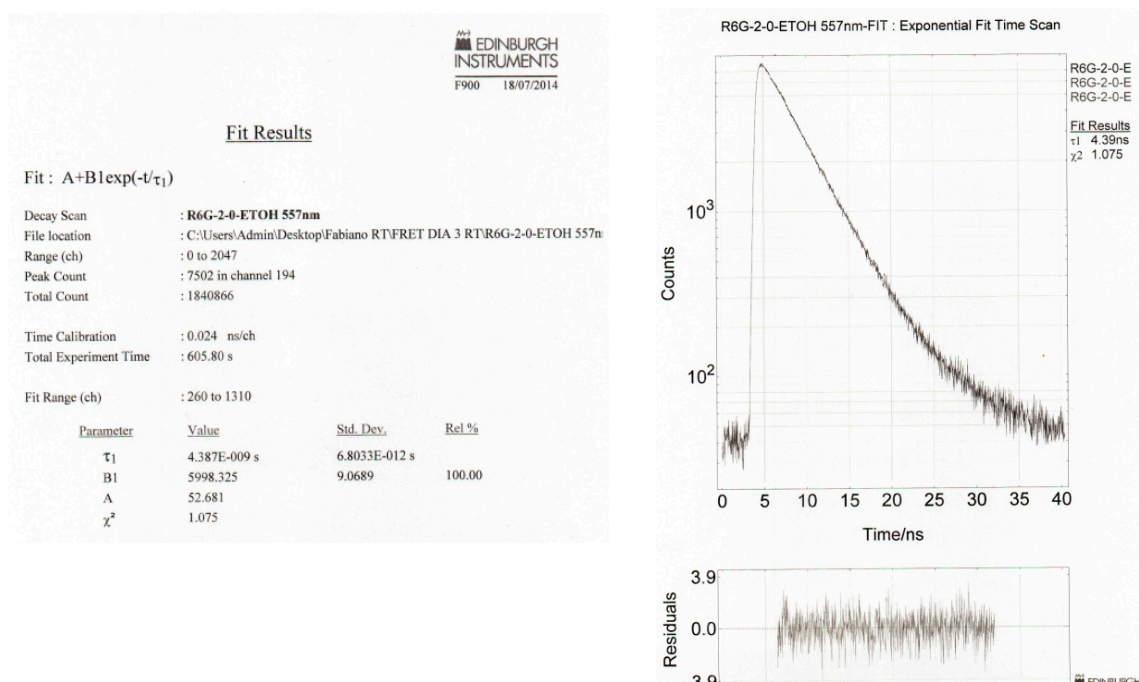

**Figure S4.** Relevant data from time-resolved fluorescence spectroscopy (left) and time decay curve and respective residuals from R6G in ethanol solution. (Excitation wavelength: 405 nm; monitored emission wavelength: 577 nm).

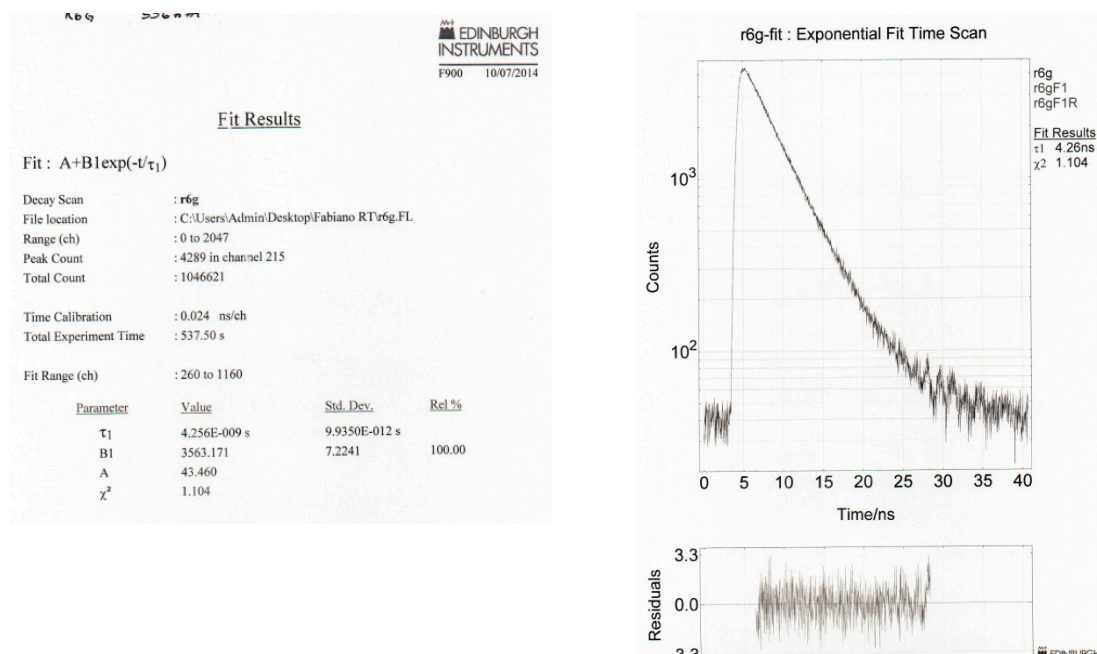

**Figure S5.** Relevant data from time-resolved fluorescence spectroscopy (left) and time decay curve and respective residuals from R6G in buffer solution. (Excitation wavelength: 405 nm; monitored emission wavelength: 556 nm).

**Table S2.** Working concentrations for the photophysical characterization.

| Solution   | Solvent | Concentration (mol·L <sup>-1</sup> ) |                                  |                                   |                             |
|------------|---------|--------------------------------------|----------------------------------|-----------------------------------|-----------------------------|
|            |         | DEA3HF<br>(x10 <sup>-5</sup> )       | Octaacid<br>(x10 <sup>-5</sup> ) | Phosphate<br>(x10 <sup>-3</sup> ) | R6G<br>(x10 <sup>-5</sup> ) |
| Buffer     | Water   | -                                    | -                                | 10                                | -                           |
| Stock 1    | Water   | 1.56                                 | 6.24                             | 10                                | -                           |
| Stock 2    | Water   | -                                    | -                                | 10                                | 1.56                        |
| Solution 1 | Water   | 0.78                                 | 3.12                             | 10                                | -                           |
| Solution 2 | Water   | -                                    | -                                | 10                                | 0.78                        |
| Solution 3 | Water   | 0.78                                 | 3.12                             | 10                                | 0.78                        |

**Table S3.** Time-resolved fluorescence spectroscopy data from DEA3HF@(OA)<sub>2</sub> in sodium tetraborate buffer in the presence of different amounts of R6G, where  $\lambda_{\text{obs}}$  is the analyzed emission wavelength, B is the pre-exponential factor,  $\tau$  is the fluorescence lifetime, Rel. is relative contribution and  $\chi^2$  is the chi-square of the fit.

| <b>Molar Ratio</b><br><b>DEA3HF@(OA)<sub>2</sub>:R6G</b> | <b><math>\lambda_{\text{obs}}</math></b><br><b>(nm)</b> | <b>B<sub>1</sub></b> | <b><math>\tau_1</math></b><br><b>(ns)</b> | <b>Rel.</b><br><b>%</b> | <b>B<sub>2</sub></b> | <b><math>\tau_2</math></b><br><b>(ns)</b> | <b>Rel.</b><br><b>%</b> | <b><math>\chi^2</math></b> | <b><math>\tau_{\text{av}}</math></b><br><b>(ns)</b> | <b><math>\tau_0/\tau</math></b> |
|----------------------------------------------------------|---------------------------------------------------------|----------------------|-------------------------------------------|-------------------------|----------------------|-------------------------------------------|-------------------------|----------------------------|-----------------------------------------------------|---------------------------------|
| 0                                                        | 492                                                     | 958.436              | 1.179                                     | 16.94                   | 1669.098             | 3.320                                     | 83.06                   | 1.075                      | 2.96                                                | 1.00                            |
| 2.0                                                      | 492                                                     | 510.165              | 1.327                                     | 19.20                   | 875.271              | 3.254                                     | 80.80                   | 1.080                      | 2.88                                                | 1.03                            |
| 1.5                                                      | 492                                                     | 784.478              | 1.292                                     | 19.07                   | 1378.171             | 3.122                                     | 80.93                   | 1.029                      | 2.77                                                | 1.07                            |
| 1.0                                                      | 492                                                     | 689.508              | 1.443                                     | 22.80                   | 1000.828             | 3.367                                     | 77.20                   | 1.032                      | 2.93                                                | 1.01                            |
| 0.5                                                      | 492                                                     | 1608.641             | 1.725                                     | 29.71                   | 1723.865             | 3.808                                     | 70.29                   | 1.015                      | 3.19                                                | 0.93                            |
| 0.1                                                      | 492                                                     | 1837.309             | 1.570                                     | 24.37                   | 2376.601             | 3.768                                     | 75.63                   | 1.052                      | 3.23                                                | 0.92                            |

Excitation Source: EPL405

**Table S4.** Time-resolved fluorescence spectroscopy data from DEA3HF@(OA)<sub>2</sub> in sodium tetraborate buffer in the presence of different amounts of R6G, where  $\lambda_{\text{obs}}$  is the analyzed emission wavelength, B is the pre-exponential factor,  $\tau$  is the fluorescence lifetime, Rel. is relative contribution and  $\chi^2$  is the chi-square of the fit.

| <b>Molar Ratio</b>                 | <b><math>\lambda_{\text{obs}}</math></b> |                      | <b><math>\tau_1</math></b> | <b>Rel.</b> |                      | <b><math>\tau_2</math></b> | <b>Rel.</b> |                            | <b><math>\tau_{\text{av}}</math></b> |                                 |
|------------------------------------|------------------------------------------|----------------------|----------------------------|-------------|----------------------|----------------------------|-------------|----------------------------|--------------------------------------|---------------------------------|
| <b>DEA3HF@(OA)<sub>2</sub>:R6G</b> | <b>(nm)</b>                              | <b>B<sub>1</sub></b> | <b>(ns)</b>                | <b>%</b>    | <b>B<sub>2</sub></b> | <b>(ns)</b>                | <b>%</b>    | <b><math>\chi^2</math></b> | <b>(ns)</b>                          | <b><math>\tau_0/\tau</math></b> |
| 0                                  | 566                                      | 1980.91              | 1.21                       | 21          | 2444.35              | 3.69                       | 79          | 1.04                       | 3.17                                 | 1.00                            |
| 2.0                                | 562                                      | 893.03               | 1.76                       | 11          | 2551.97              | 5.15                       | 89          | 1.07                       | 4.79                                 | 1.51                            |
| 1.5                                | 564                                      | 1058.11              | 2.27                       | 6           | 6859.45              | 5.18                       | 94          | 1.08                       | 5.00                                 | 1.58                            |
| 1.0                                | 567                                      | 5227.72              | 3.31                       | 24          | 9950.59              | 5.54                       | 76          | 1.09                       | 5.01                                 | 1.58                            |
| 0.5                                | 569                                      | 3734.45              | 3.19                       | 17          | 10648.18             | 5.37                       | 83          | 1.04                       | 4.99                                 | 1.58                            |
| 0.1                                | 571                                      | 5253.29              | 2.98                       | 16          | 15957.70             | 5.32                       | 84          | 1.05                       | 4.96                                 | 1.56                            |

Excitation Source: EPL405



**Table S5.** Time-resolved fluorescence spectroscopy data from DEA3HF in ethanol in the presence of different amounts of R6G, where  $\lambda_{\text{obs}}$  is the analyzed emission wavelength, B is the pre-exponential factor,  $\tau$  is the fluorescence lifetime, Rel. is relative contribution and  $\chi^2$  is the chi-square of the fit.

| <b>Molar Ratio</b><br><b>DEA3HF:R6G</b> | <b><math>\lambda_{\text{obs}}</math></b><br><b>(nm)</b> | <b>B<sub>1</sub></b> | <b><math>\tau_1</math></b><br><b>(ns)</b> | <b>Rel.</b><br><b>%</b> | <b>B<sub>2</sub></b> | <b><math>\tau_2</math></b><br><b>(ns)</b> | <b>Rel.</b><br><b>%</b> | <b><math>\chi^2</math></b> | <b><math>\tau_{\text{av}}</math></b><br><b>(ns)</b> | <b><math>\tau_0/\tau</math></b> |
|-----------------------------------------|---------------------------------------------------------|----------------------|-------------------------------------------|-------------------------|----------------------|-------------------------------------------|-------------------------|----------------------------|-----------------------------------------------------|---------------------------------|
| 0                                       | 529                                                     | 11341.945            | 2.087                                     | 100                     | -                    | -                                         | -                       | 1.101                      | 2.09                                                | 1.00                            |
| 2.0                                     | 526                                                     | 7651.191             | 2.030                                     | 100                     | -                    | -                                         | -                       | 1.105                      | 2.03                                                | 1.03                            |
| 1.5                                     | 529                                                     | 9235.787             | 2.071                                     | 100                     | -                    | -                                         | -                       | 1.101                      | 2.07                                                | 1.01                            |
| 1.0                                     | 529                                                     | 5526.172             | 2.195                                     | 100                     | -                    | -                                         | -                       | 1.118                      | 2.20                                                | 0.95                            |
| 0.5                                     | 529                                                     | 7080.537             | 2.097                                     | 85.15                   | 458.952              | 5.645                                     | 14.85                   | 1.033                      | 2.62                                                | 0.80                            |
| 0.1                                     | 529                                                     | 18793.586            | 2.131                                     | 76.92                   | 2072.220             | 5.789                                     | 23.08                   | 1.083                      | 2.98                                                | 0.70                            |

Excitation Source: EPL405

**Table S6.** Time-resolved fluorescence spectroscopy data from DEA3HF in ethanol in the presence of different amounts of R6G, where  $\lambda_{\text{obs}}$  is the analyzed emission wavelength, B is the pre-exponential factor,  $\tau$  is the fluorescence lifetime, Rel. is relative contribution and  $\chi^2$  is the chi-square of the fit.

| <b>Molar Ratio</b>                 | <b><math>\lambda_{\text{obs}}</math></b> | <b><math>B_1</math></b> | <b><math>\tau_1</math></b> | <b>Rel.</b> | <b><math>B_2</math></b> | <b><math>\tau_2</math></b> | <b>Rel.</b> | <b><math>\chi^2</math></b> | <b><math>\tau_{\text{av}}</math></b> | <b><math>\tau_0/\tau</math></b> |
|------------------------------------|------------------------------------------|-------------------------|----------------------------|-------------|-------------------------|----------------------------|-------------|----------------------------|--------------------------------------|---------------------------------|
| <b>DEA3HF@(OA)<sub>2</sub>:R6G</b> | <b>(nm)</b>                              |                         | <b>(ns)</b>                | <b>%</b>    |                         | <b>(ns)</b>                | <b>%</b>    |                            | <b>(ns)</b>                          |                                 |
| 0                                  | 557                                      | 7469.79                 | 2.07                       | 100         | -                       | -                          | -           | 1.08                       | 2.07                                 | 1.00                            |
| 2.0                                | 541                                      | 14030.72                | 2.14                       | 100         | -                       | -                          | -           | 1.09                       | 2.14                                 | 1.03                            |
| 1.5                                | 553                                      | 7371.43                 | 2.19                       | 67          | 1798.74                 | 4.52                       | 33          | 0.96                       | 2.97                                 | 1.43                            |
| 1.0                                | 556                                      | 4607.63                 | 2.23                       | 44          | 3079.30                 | 4.39                       | 56          | 1.08                       | 3.46                                 | 1.67                            |
| 0.5                                | 557                                      | 6537.20                 | 2.34                       | 35          | 6206.55                 | 4.54                       | 65          | 1.07                       | 3.77                                 | 1.82                            |
| 0.1                                | 559                                      | 4871.56                 | 2.57                       | 32          | 5442.68                 | 4.98                       | 68          | 1.03                       | 4.22                                 | 2.04                            |

Excitation Source: EPL405

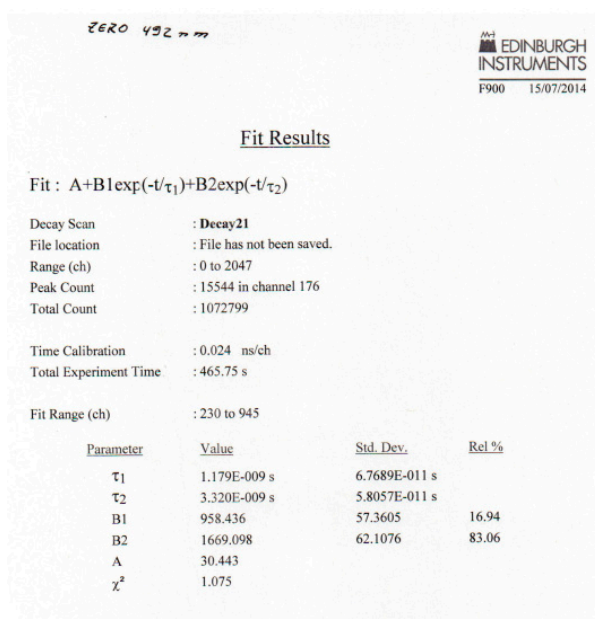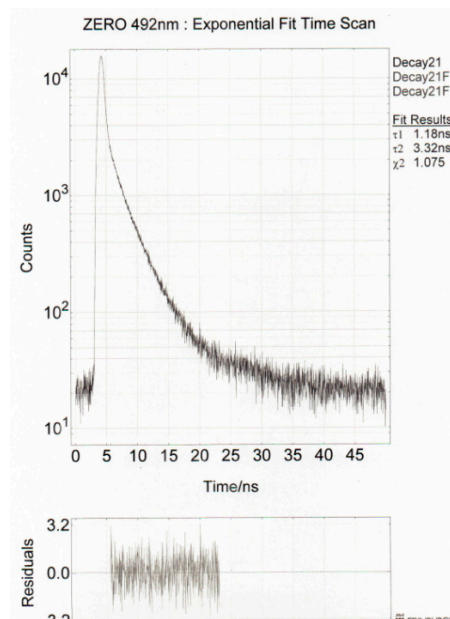

**Figure S6.** Relevant data from time-resolved fluorescence spectroscopy (left) and time decay curve and respective residuals from DEA3HF@(OA)<sub>2</sub> in sodium tetraborate buffer. (Excitation wavelength: 405 nm; monitored emission wavelength: 492 nm).

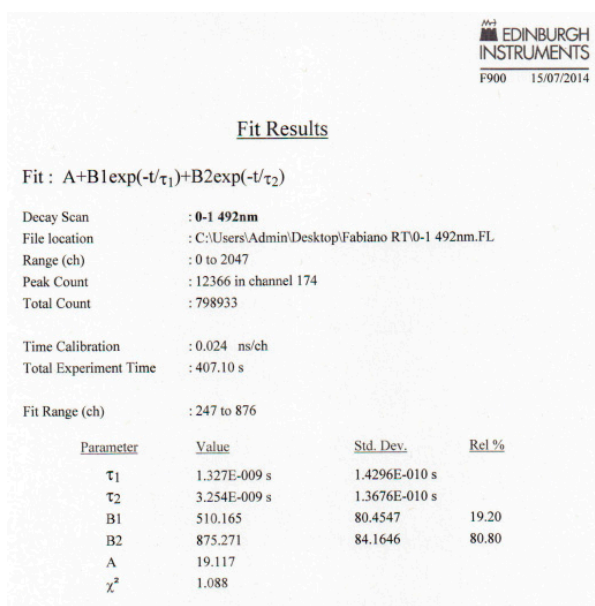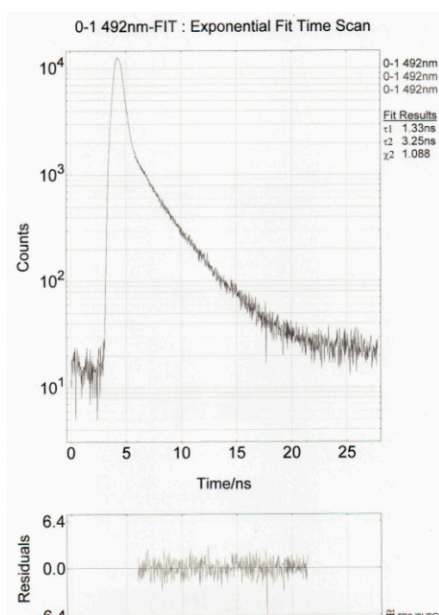

**Figure S7.** Relevant data from time-resolved fluorescence spectroscopy (left) and time decay curve and respective residuals from DEA3HF@(OA)<sub>2</sub>:R6G molar ratio=2.0 in sodium tetraborate buffer. (Excitation wavelength: 405 nm; monitored emission wavelength: 492 nm).

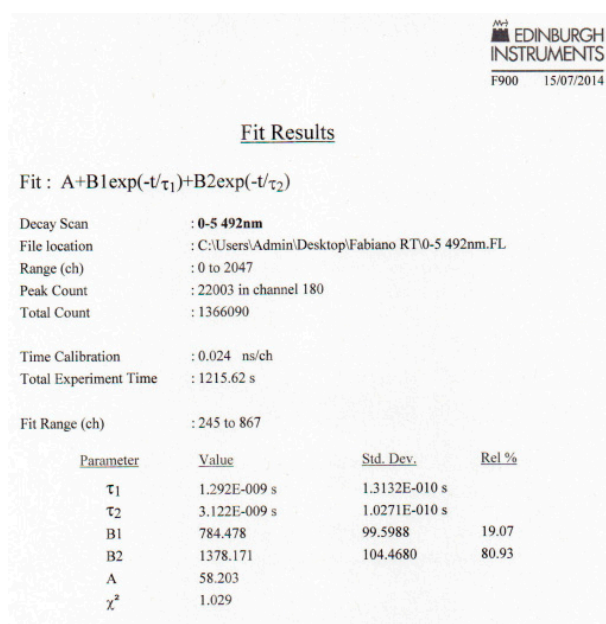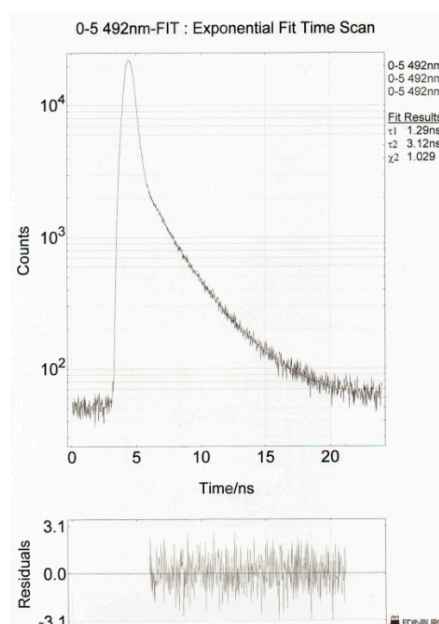

**Figure S8.** Relevant data from time-resolved fluorescence spectroscopy (left) and time decay curve and respective residuals from DEA3HF@(OA)<sub>2</sub>:R6G molar ratio=1.5 in sodium tetraborate buffer @492 nm. (Excitation wavelength: 405 nm; monitored emission wavelength: 492 nm).

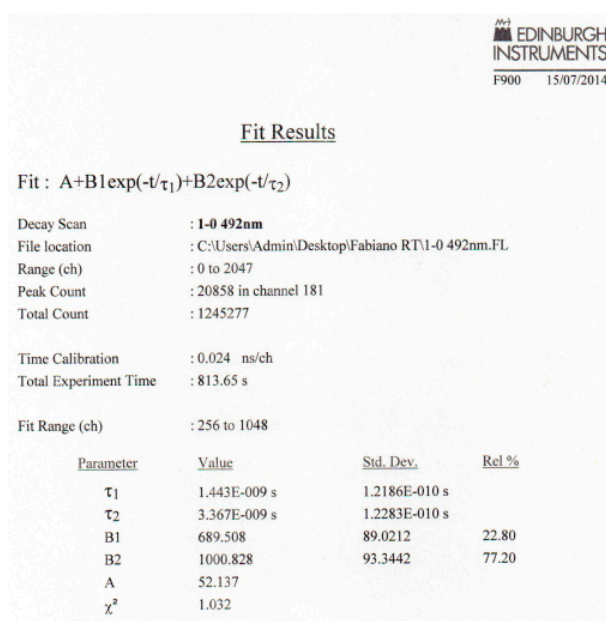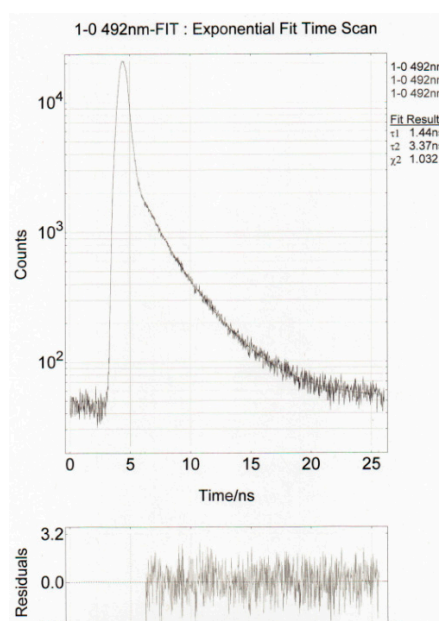

**Figure S9.** Relevant data from time-resolved fluorescence spectroscopy (left) and time decay curve and respective residuals from DEA3HF@(OA)<sub>2</sub>:R6G molar ratio=1.0 in sodium tetraborate buffer. (Excitation wavelength: 405 nm; monitored emission wavelength: 492 nm).

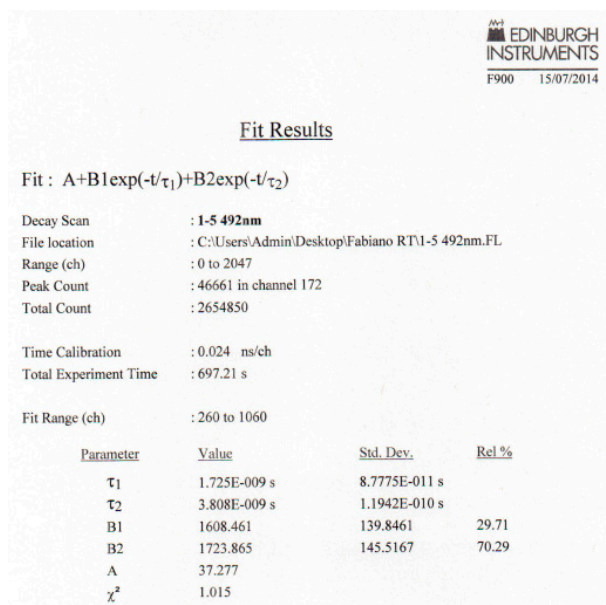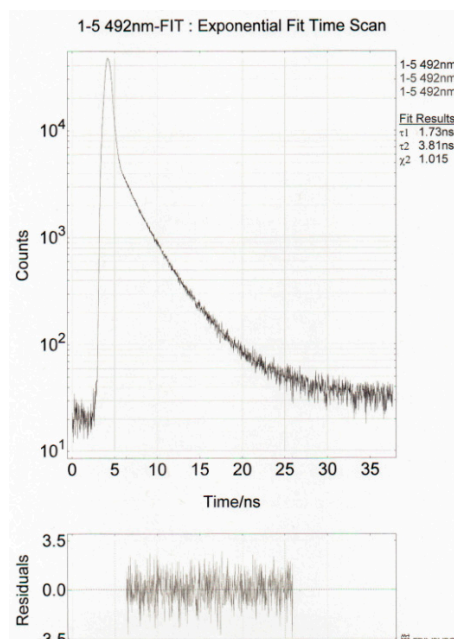

**Figure S10.** Relevant data from time-resolved fluorescence spectroscopy (left) and time decay curve and respective residuals from DEA3HF@(OA)<sub>2</sub>:R6G molar ratio=0.5 in sodium tetraborate buffer. (Excitation wavelength: 405 nm; monitored emission wavelength: 492 nm).

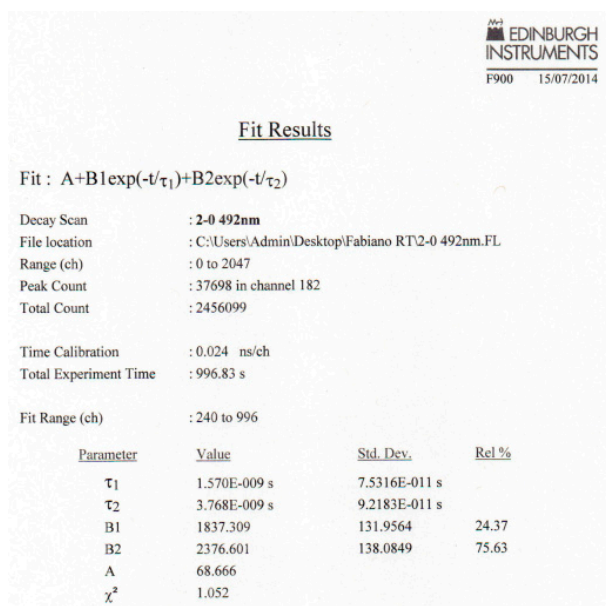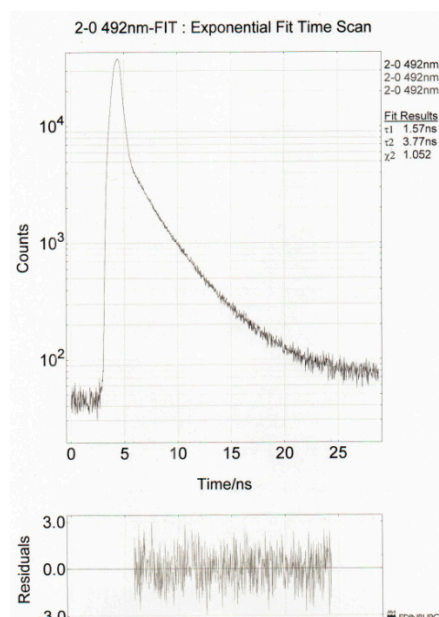

**Figure S11.** Relevant data from time-resolved fluorescence spectroscopy (left) and time decay curve and respective residuals from DEA3HF@(OA)<sub>2</sub>:R6G molar ratio=0.1 in sodium tetraborate buffer. (Excitation wavelength: 405 nm; monitored emission wavelength: 492 nm).



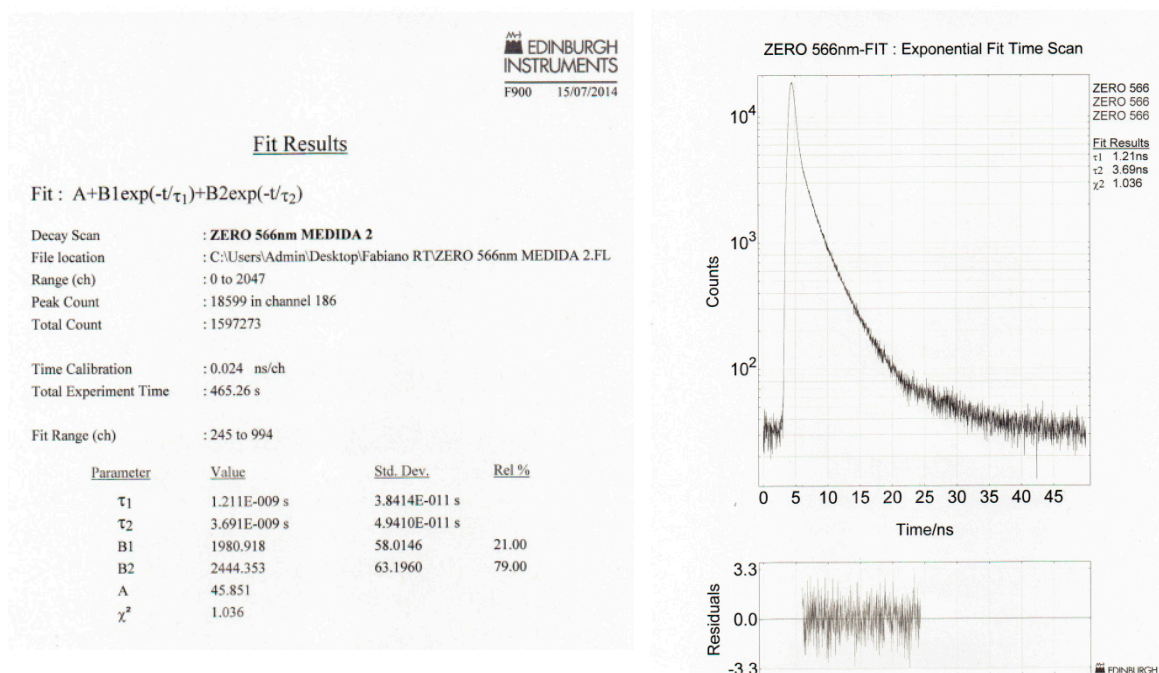

**Figure S12.** Relevant data from time-resolved fluorescence spectroscopy (left) and time decay curve and respective residuals from DEA3HF@(OA)<sub>2</sub> in sodium tetraborate buffer. (Excitation wavelength: 405 nm; monitored emission wavelength: 566 nm).

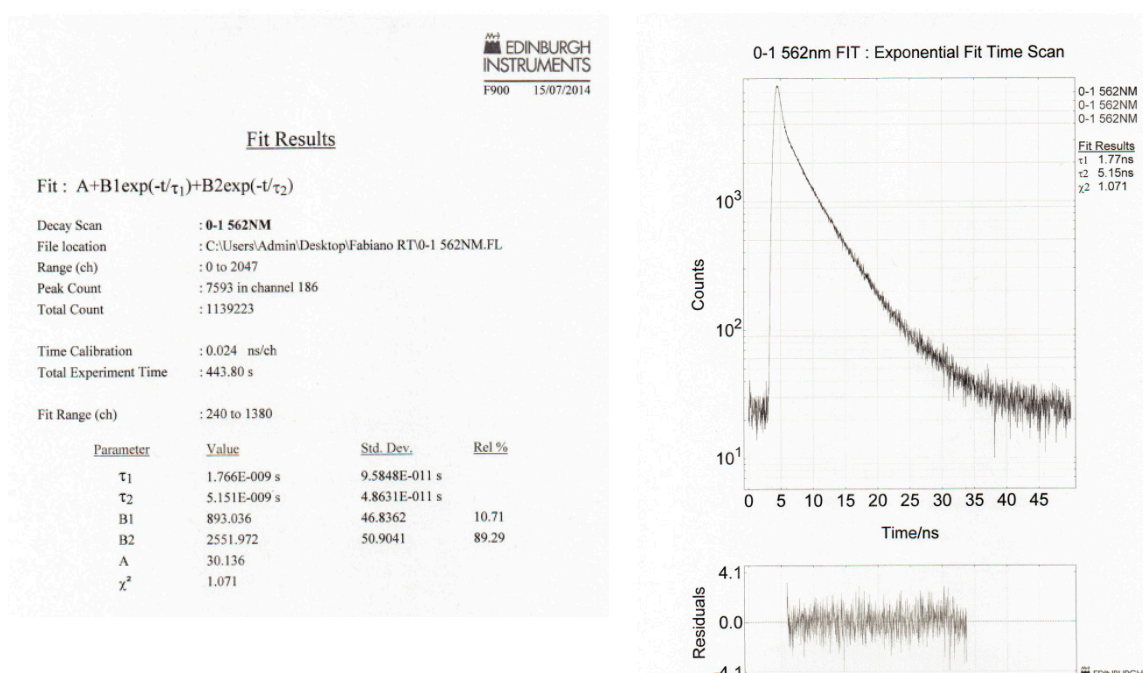

**Figure S13.** Relevant data from time-resolved fluorescence spectroscopy (left) and time decay curve and respective residuals from DEA3HF@(OA)<sub>2</sub>:R6G molar ratio=2.0 in sodium tetraborate buffer. (Excitation wavelength: 405 nm; monitored emission wavelength: 562 nm).

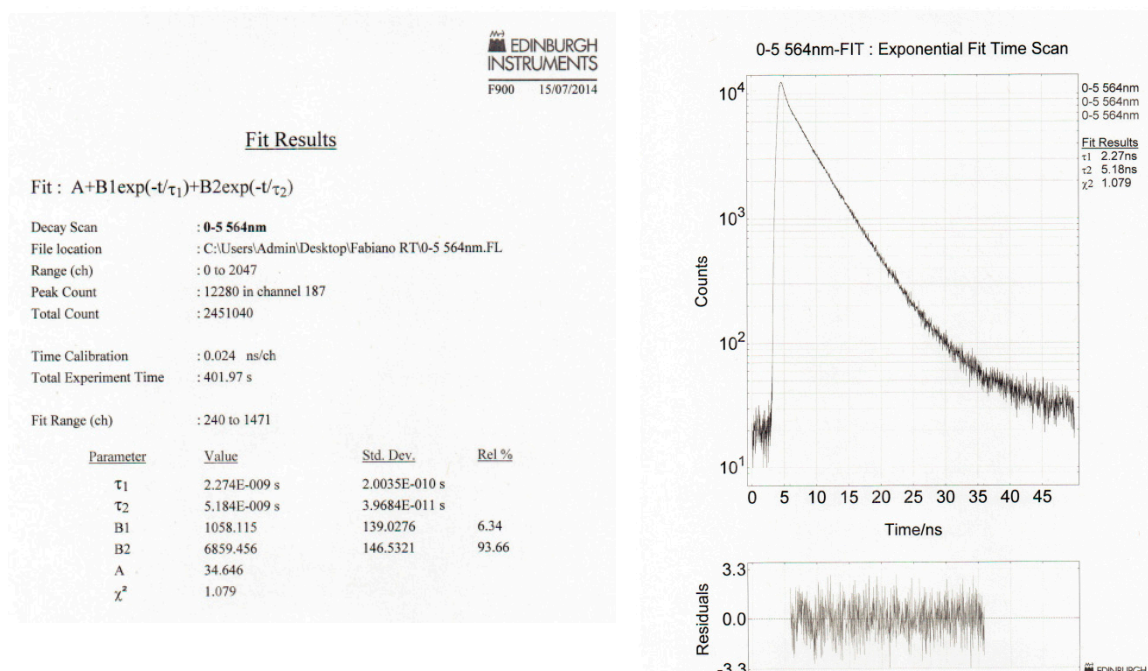

**Figure S14.** Relevant data from time-resolved fluorescence spectroscopy (left) and time decay curve and respective residuals from DEA3HF@(OA)<sub>2</sub>:R6G molar ratio=1.5 in sodium tetraborate buffer. (Excitation wavelength: 405 nm; monitored emission wavelength: 564 nm).

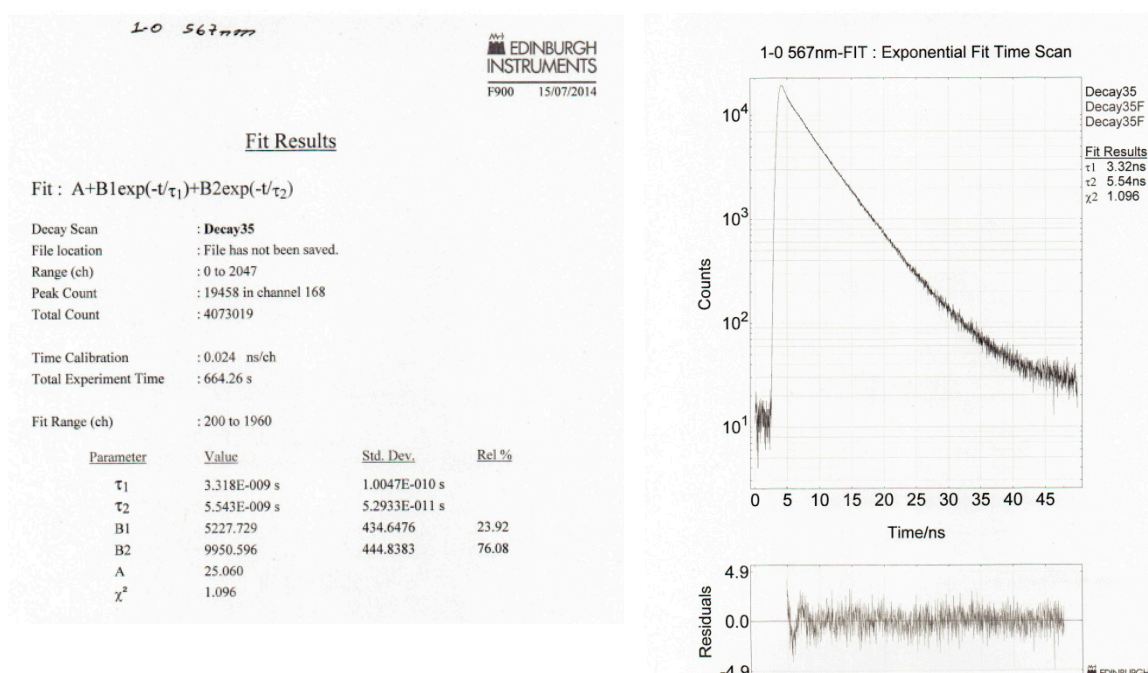

**Figure S15.** Relevant data from time-resolved fluorescence spectroscopy (left) and time decay curve and respective residuals from DEA3HF@(OA)<sub>2</sub>:R6G molar ratio=1.0 in sodium tetraborate buffer. (Excitation wavelength: 405 nm; monitored emission wavelength: 567 nm).

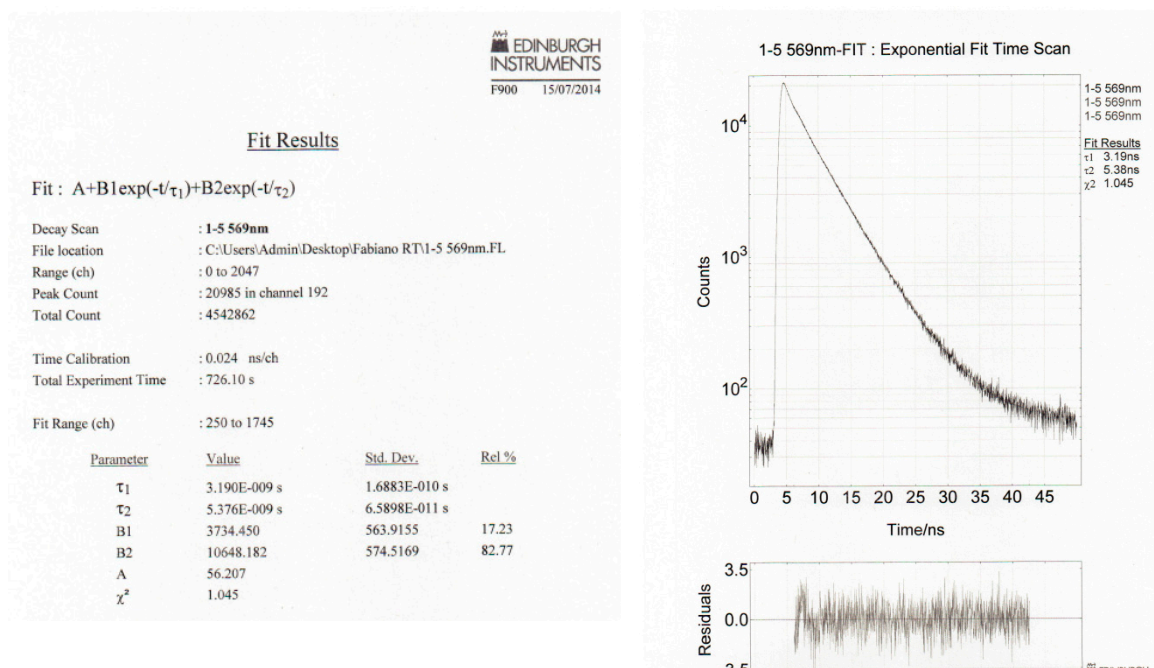

**Figure S16.** Relevant data from time-resolved fluorescence spectroscopy (left) and time decay curve and respective residuals from DEA3HF@(OA)<sub>2</sub>:R6G molar ratio=0.5 in sodium tetraborate buffer. (Excitation wavelength: 405 nm; monitored emission wavelength: 569 nm).

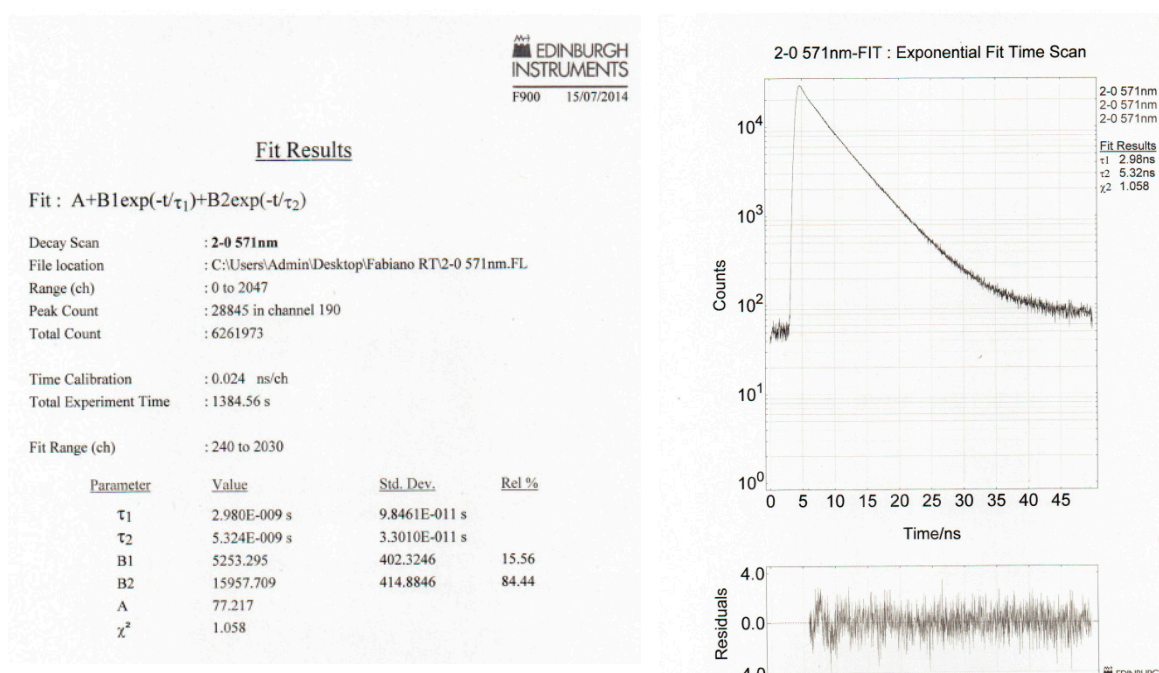

**Figure S17.** Relevant data from time-resolved fluorescence spectroscopy (left) and time decay curve and respective residuals from DEA3HF@(OA)<sub>2</sub>:R6G molar ratio=0.1 in sodium tetraborate buffer. (Excitation wavelength: 405 nm; monitored emission wavelength: 571 nm).



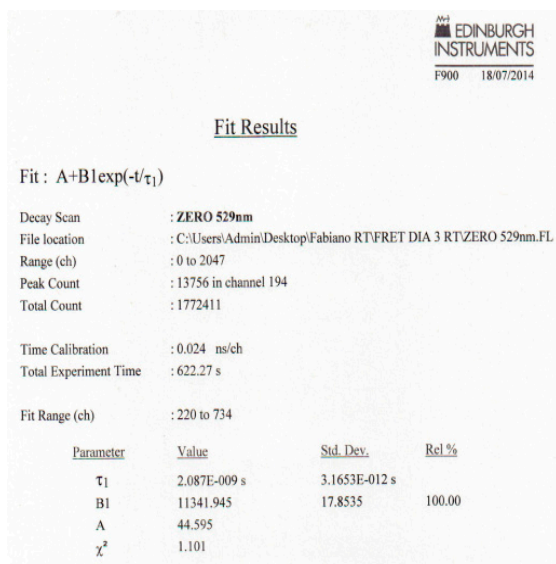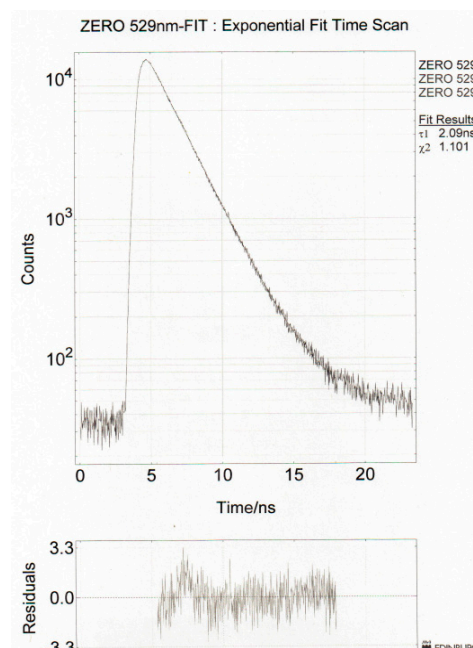

**Figure S18.** Relevant data from time-resolved fluorescence spectroscopy (left) and time decay curve and respective residuals from DEA3HF in ethanol. (Excitation wavelength: 405 nm; monitored emission wavelength: 529 nm).

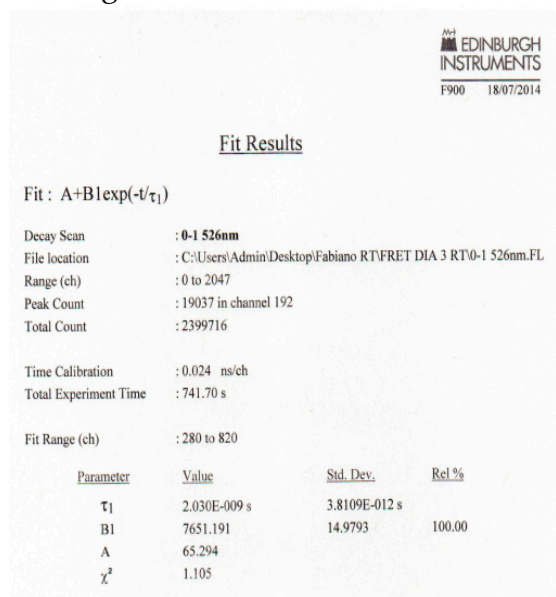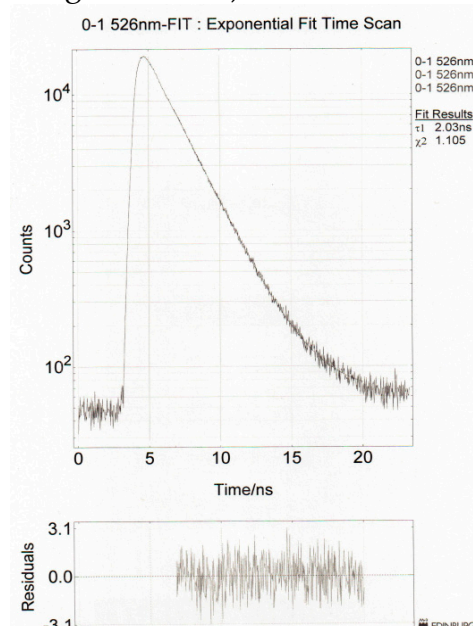

**Figure S19.** Relevant data from time-resolved fluorescence spectroscopy (left) and time decay curve and respective residuals from DEA3HF:R6G molar ratio=2.0 in ethanol. (Excitation wavelength: 405 nm; monitored emission wavelength: 526 nm).

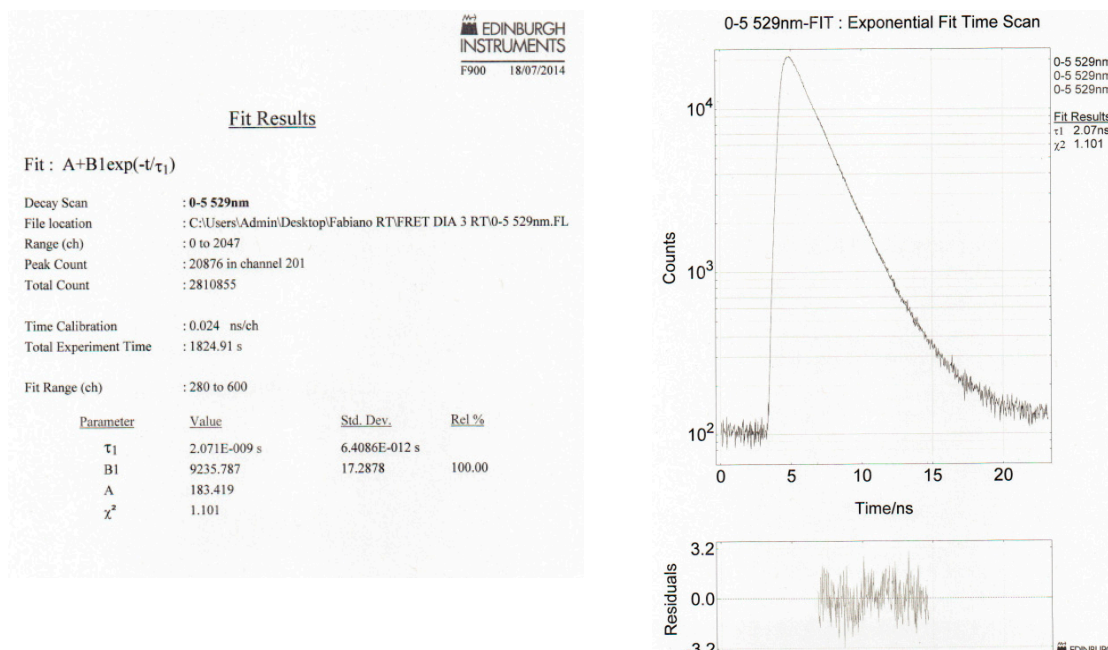

**Figure S20.** Relevant data from time-resolved fluorescence spectroscopy (left) and time decay curve and respective residuals from DEA3HF:R6G molar ratio=1.5 in ethanol. (Excitation wavelength: 405 nm; monitored emission wavelength: 529 nm).

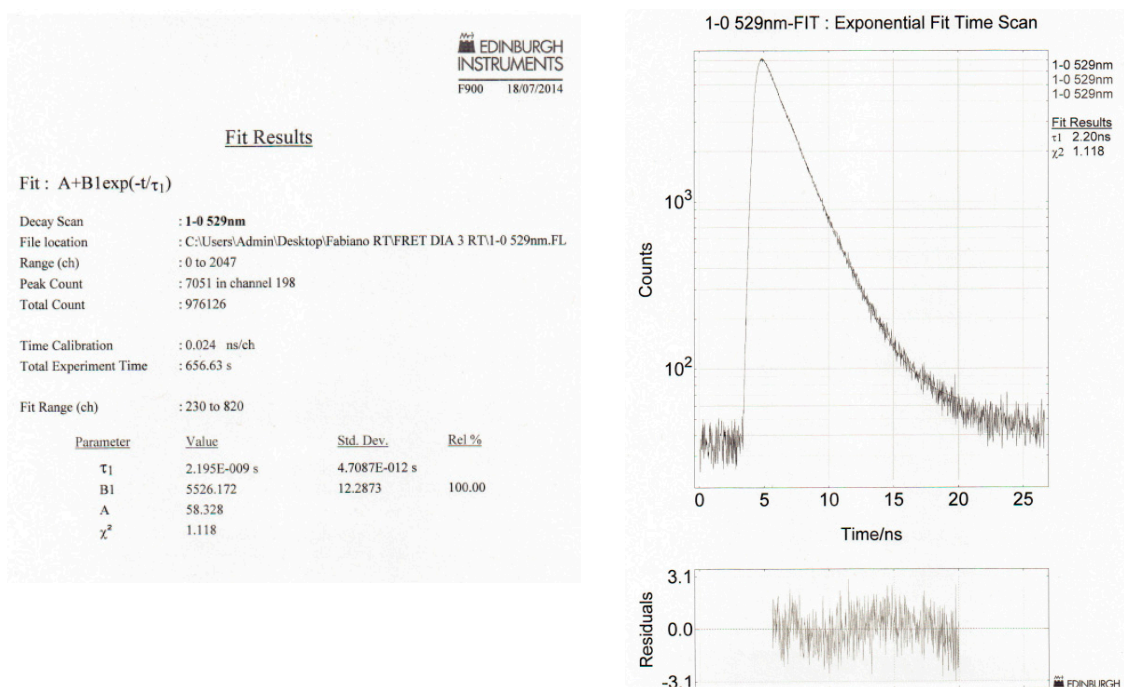

**Figure S21.** Relevant data from time-resolved fluorescence spectroscopy (left) and time decay curve and respective residuals from DEA3HF:R6G molar ratio=1.0 in ethanol. (Excitation wavelength: 405 nm; monitored emission wavelength: 529 nm).

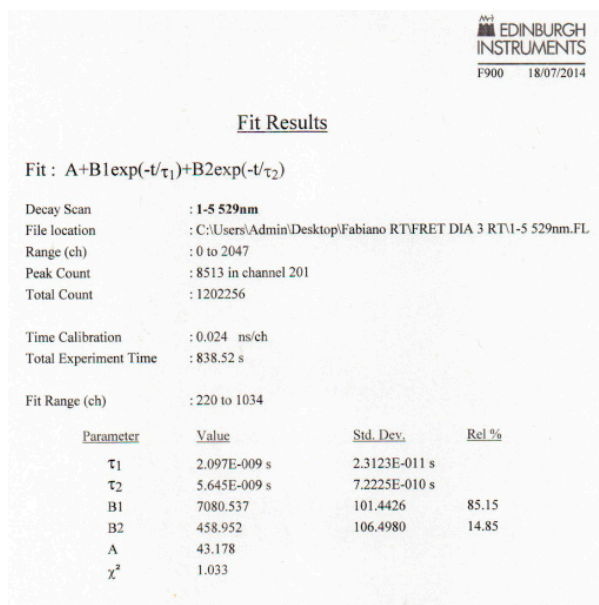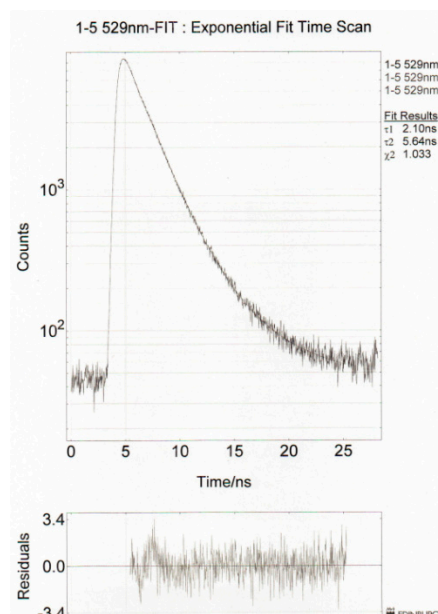

**Figure S22.** Relevant data from time-resolved fluorescence spectroscopy (left) and time decay curve and respective residuals from DEA3HF:R6G molar ratio=0.5 in ethanol. (Excitation wavelength: 405 nm; monitored emission wavelength: 529 nm).

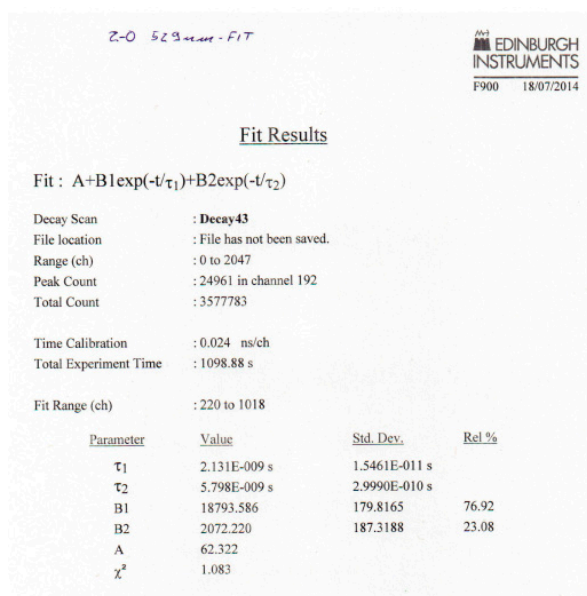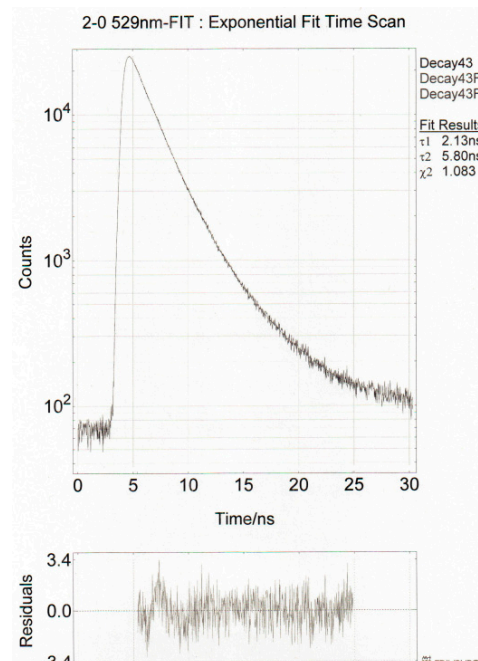

**Figure S23.** Relevant data from time-resolved fluorescence spectroscopy (left) and time decay curve and respective residuals from DEA3HF:R6G molar ratio=0.1 in ethanol. (Excitation wavelength: 405 nm; monitored emission wavelength: 529 nm).



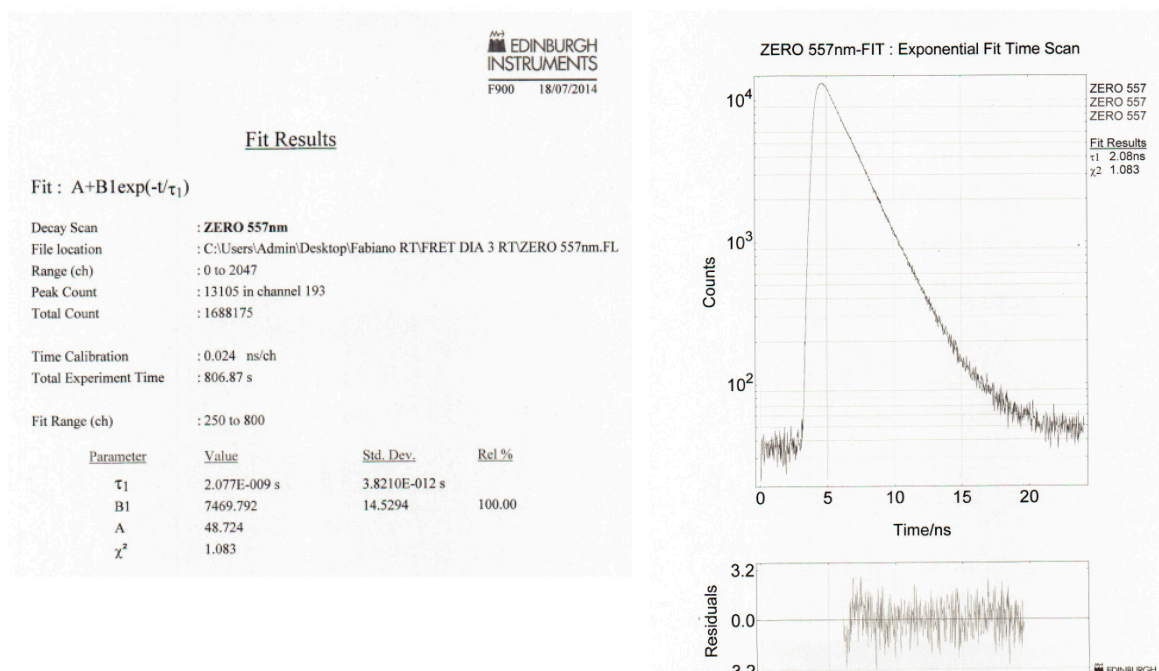

**Figure S24.** Relevant data from time-resolved fluorescence spectroscopy (left) and time decay curve and respective residuals from DEA3HF in ethanol. (Excitation wavelength: 405 nm; monitored emission wavelength: 557 nm).

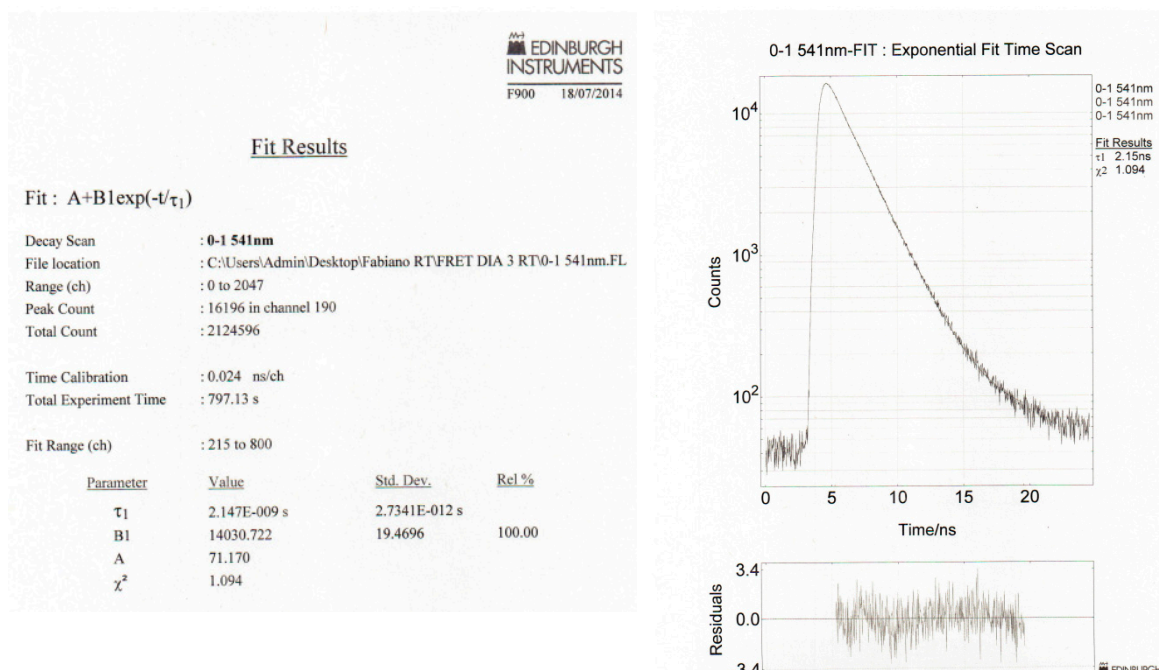

**Figure S25.** Relevant data from time-resolved fluorescence spectroscopy (left) and time decay curve and respective residuals from DEA3HF:R6G molar ratio=2.0 in ethanol. (Excitation wavelength: 405 nm; monitored emission wavelength: 541 nm).

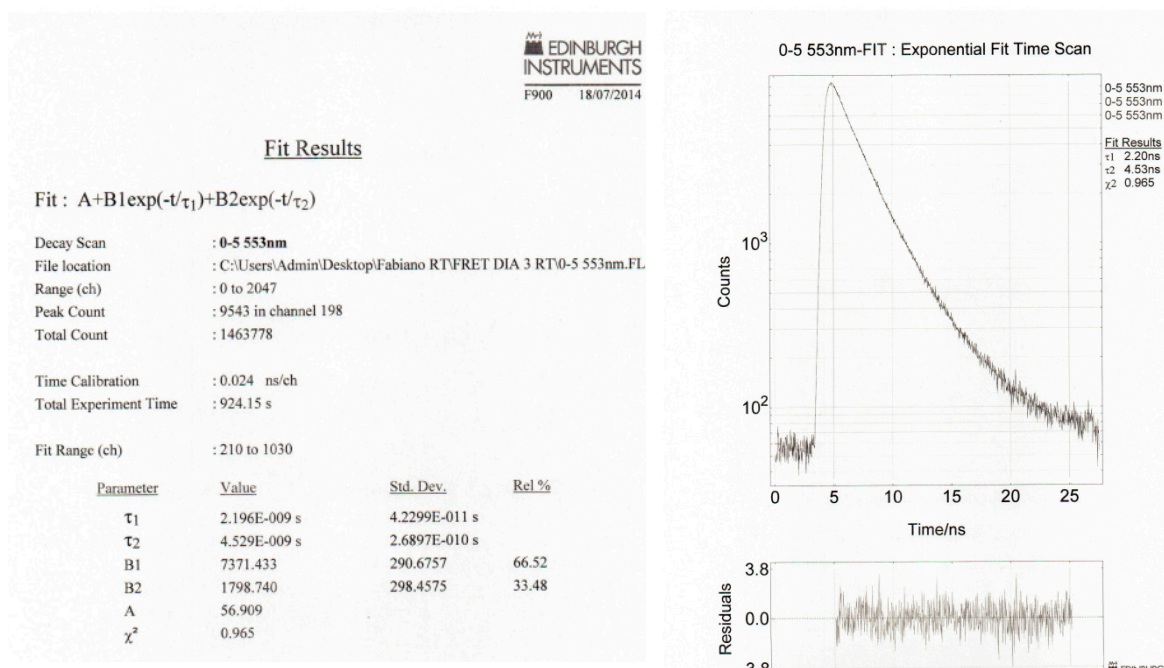

**Figure S26.** Relevant data from time-resolved fluorescence spectroscopy (left) and time decay curve and respective residuals from DEA3HF:R6G molar ratio=1.5 in ethanol. (Excitation wavelength: 405 nm; monitored emission wavelength: 553 nm).

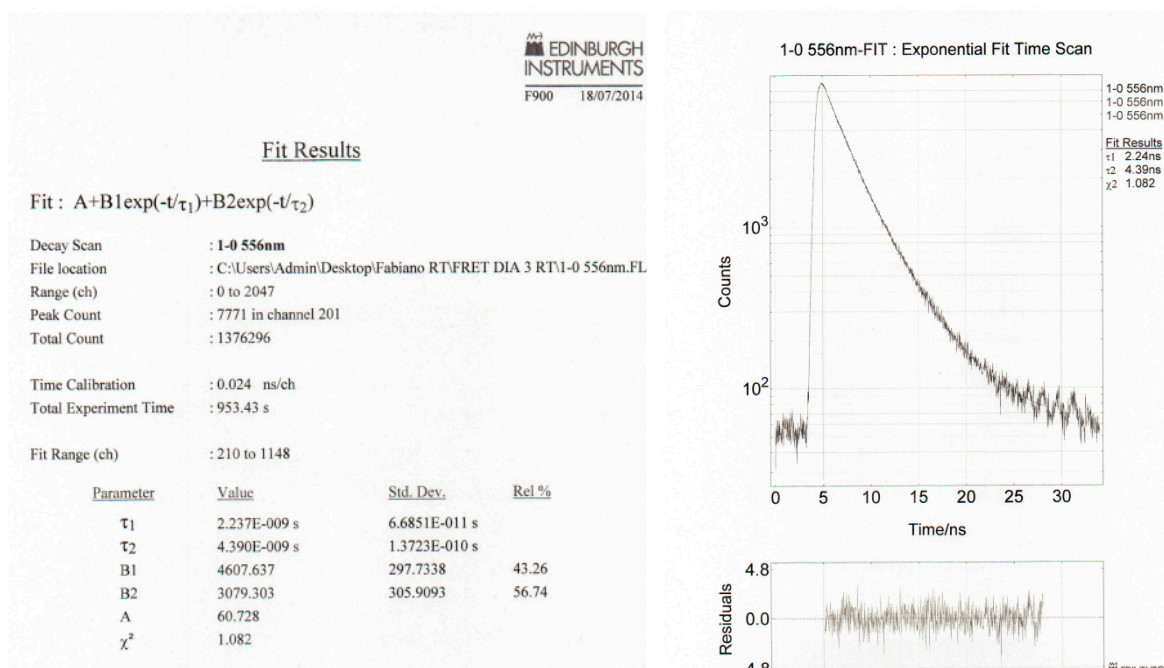

**Figure S27.** Relevant data from time-resolved fluorescence spectroscopy (left) and time decay curve and respective residuals from DEA3HF:R6G molar ratio=1.0 in ethanol. (Excitation wavelength: 405 nm; monitored emission wavelength: 556 nm).

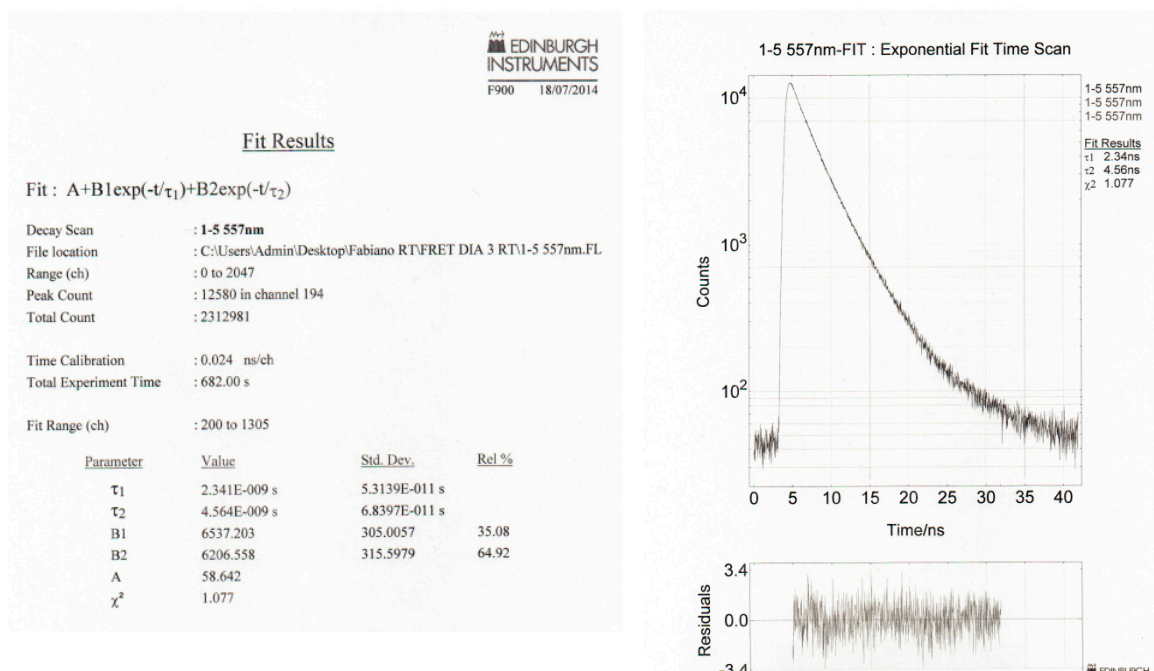

**Figure S28.** Relevant data from time-resolved fluorescence spectroscopy (left) and time decay curve and respective residuals from DEA3HF:R6G molar ratio=0.5 in ethanol. (Excitation wavelength: 405 nm; monitored emission wavelength: 557 nm).

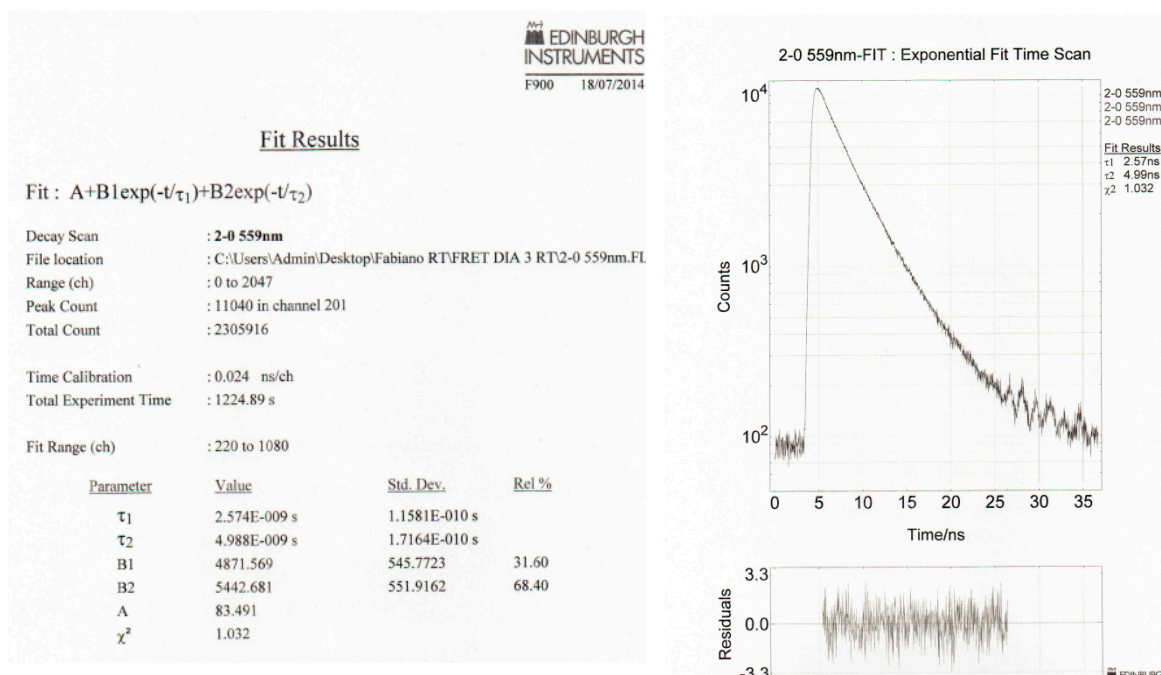

**Figure S29.** Relevant data from time-resolved fluorescence spectroscopy (left) and time decay curve and respective residuals from DEA3HF:R6G molar ratio=0.1 in ethanol. (Excitation wavelength: 405 nm; monitored emission wavelength: 559 nm).

**Table S7.** Working concentration for Stern-Volmer plot.

| System                   | Molar Ratio | Concentration<br>(10 <sup>-6</sup> mol/L) |          |
|--------------------------|-------------|-------------------------------------------|----------|
|                          |             | Donor                                     | Acceptor |
|                          |             | DEA3HF                                    | R6G      |
| DEA3HF@(OA) <sub>2</sub> | 0           | 15.6                                      | 0        |
|                          | 2.0         |                                           | 1.58     |
|                          | 1.5         |                                           | 7.92     |
|                          | 1.0         |                                           | 15.8     |
|                          | 0.5         |                                           | 23.8     |
|                          | 0.1         |                                           | 31.7     |
| DEA3HF in ethanol        | 0           | 5.20                                      | 0        |
|                          | 2.0         |                                           | 0.53     |
|                          | 1.5         |                                           | 2.63     |
|                          | 1.0         |                                           | 5.27     |
|                          | 0.5         |                                           | 7.90     |
|                          | 0.1         |                                           | 10.5     |

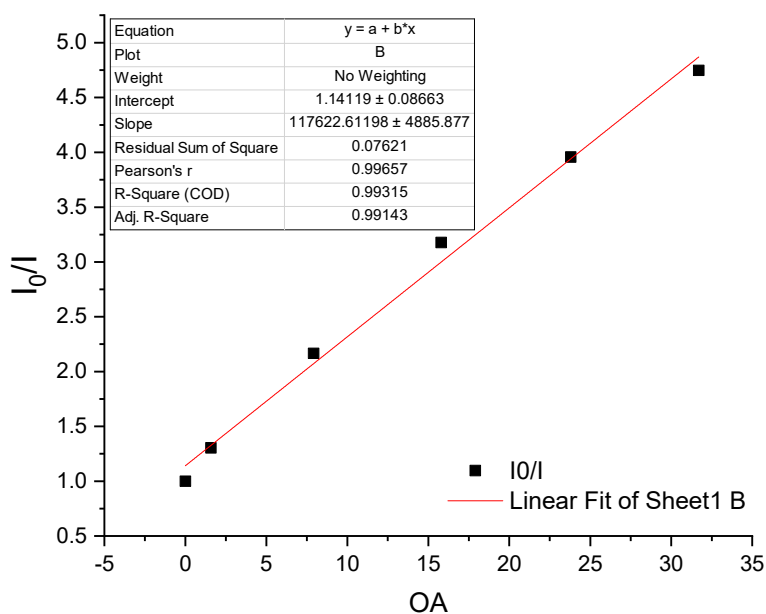

**Figure S30.** Stern-Volmer plot of DEA3HF@(OA)<sub>2</sub> in sodium tetraborate buffer in the presence of different amounts of R6G. The parameters from the linear fit are also presented for calculation purposes.

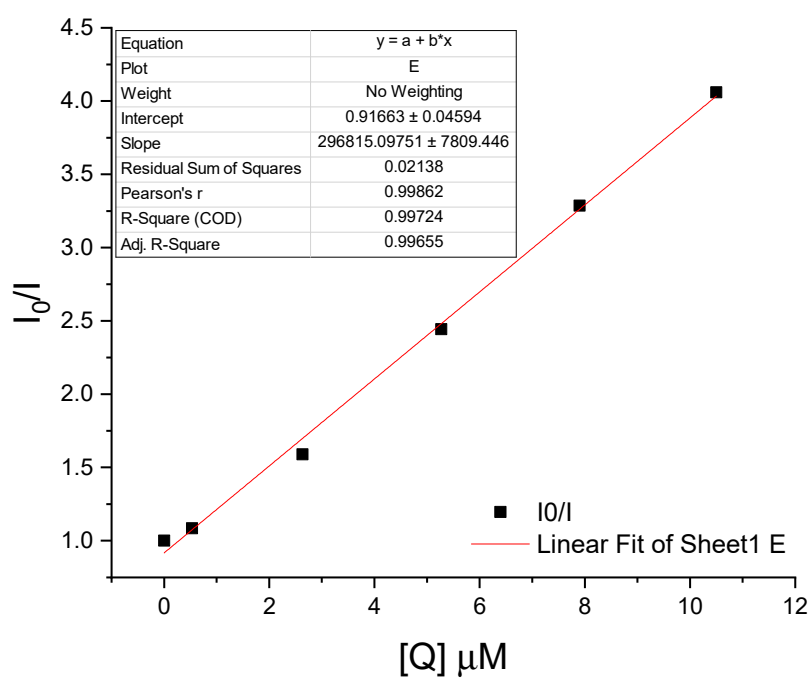

**Figure S31.** Stern-Volmer plot of DEA3HF in ethanol in the presence of different amounts of R6G. The parameters from the linear fit are also presented for calculation purposes.
